# Supplementary material for: Brain Volumetric Correlates of Right Unilateral Versus Bitemporal Electroconvulsive Therapy for Treatment-Resistant Depression
Source: Atypon-hosted journal article supplement (doi:10.1176/appi.neuropsych.18080177), 2018-11-21
Supplement: appi.neuropsych.18080177.ds001.pdf [file appi.neuropsych.18080177.ds001.pdf]

## **Supplementary Material**

**Table S1.** Concurrent pharmacological regimen of the study samples

| <b>Subject*</b> | <b>EP</b> | <b>SSRI</b> | <b>SNRI</b>                                   | <b>NaSSA</b> | <b>TCA</b> | <b>Antipsychotics</b> | <b>Lithium</b> | <b>BZD</b>    |
|-----------------|-----------|-------------|-----------------------------------------------|--------------|------------|-----------------------|----------------|---------------|
| 1               | BT        | Fluoxetine  | Venlafaxine                                   |              |            | Olanzapine            |                |               |
| 2               | BT        |             | Venlafaxine                                   |              |            | Olanzapine            |                | Lormetazepam  |
| 3               | BT        | Paroxetine  | Venlafaxine                                   |              |            |                       | Lithium        |               |
| 4               | BT        |             | Duloxetine                                    | Mirtazapine  |            | Quetiapine            |                |               |
| 5               | BT        | Fluoxetine  |                                               |              |            | Quetiapine            |                |               |
| 6               | BT        |             | Duloxetine                                    | Mirtazapine  |            |                       |                | Flunitrazepam |
| 7               | BT        |             | Venlafaxine                                   |              | Imipramine |                       |                | Lormetazepam  |
| 8               | BT        |             | Venlafaxine                                   |              |            | Olanzapine            |                | Clonazepam    |
| 9               | BT        |             | Duloxetine                                    | Mirtazapine  |            | Olanzapine            |                |               |
| 10              | BT        | Paroxetine  | Duloxetine                                    |              |            | Quetiapine            |                | Flunitrazepam |
| 11              | BT        | Sertraline  |                                               | Mirtazapine  | Imipramine | Aripiprazole          |                | Lormetazepam  |
| 12              | BT        | Fluoxetine  | Venlafaxine                                   |              | Imipramine | Olanzapine            | Lithium        |               |
| 13              | RUL       | Fluoxetine  |                                               |              |            |                       |                | Clonazepam    |
| 14              | RUL       |             | Duloxetine                                    |              |            |                       |                |               |
| 15              | RUL       | Sertraline  | Trazodone<br>Bupropion                        |              |            |                       |                |               |
| 16              | RUL       |             | L-Methylfolate<br>Desvenlafaxine<br>Bupropion |              |            |                       |                |               |
| 17              | RUL       |             | Bupropion                                     |              |            |                       |                |               |
| 18              | RUL       |             | Duloxetine                                    |              |            | Aripiprazole          |                | Clonazepam    |
| 19              | RUL       |             | Venlafaxine<br>Trazodone                      |              |            |                       |                | Alprazolam    |
| 20              | RUL       |             |                                               |              |            | Quetiapine            |                | Clonazepam    |
| 21              | RUL       |             | Venlafaxine<br>Trazodone                      |              |            | Haloperidol           |                |               |
| 22              | RUL       |             |                                               |              | Amoxapine  | Ziprasidone           |                |               |
| 23              | RUL       |             | Venlafaxine                                   |              |            | Aripiprazole          |                |               |

*EP*, Electrode Placement; *BT*, Bitemporal; *RUL*, Right Unilateral; *SSRI*, Serotonine-Selective-Reuptake-Inhibitor; *SNRI*, Serotonine-Noradrenaline-Reuptake-Inhibitor; *NaSSa*, Noradrenergic and Specific Serotonergic Antidepressant; *TCA*, Tricyclic Antidepressants; *BZD*, Benzodiazepines.

\* Data was missing for 1 subject.
